# Supplementary material for: Development of a QuEChERS–HPLC–FLD Procedure for the Simultaneous Detection of Residues of Florfenicol, Its Metabolite Florfenicol Amine, and Three Fluoroquinolones in Eggs
Source: MDPI journal article supplement (doi:10.3390/molecules29010252), 2024-01-03
Supplement: s1 [file s1]

**Table S1.** The mean recoveries and precisions.

| Matrix      | Analyte | Fortified Level (µg/kg) | Recovery | Between-day RSD | Within-day RSD |
|-------------|---------|-------------------------|----------|-----------------|----------------|
| Whole egg   | FF      | 5.0                     | 83.9     | 4.1             | 4.5            |
|             |         | 10.0 *                  | 93.3     | 3.4             | 3.4            |
|             |         | 20.0                    | 94.6     | 3.6             | 3.5            |
|             | FFA     | 2.0                     | 71.9     | 4.5             | 4.9            |
|             |         | 5.0                     | 82.4     | 4.6             | 4.9            |
|             |         | 10.0 *                  | 81.6     | 4.2             | 5.1            |
|             |         | 20.0                    | 82.3     | 3.1             | 3.6            |
|             | CIP     | 0.1                     | 76.0     | 4.3             | 4.9            |
|             |         | 5.0                     | 82.8     | 5.1             | 6.1            |
|             |         | 10.0 *                  | 83.6     | 3.5             | 3.6            |
|             |         | 20.0                    | 84.1     | 3.5             | 3.7            |
|             | ENR     | 0.1                     | 87.1     | 5.1             | 6.2            |
|             |         | 5.0                     | 92.1     | 4.4             | 4.7            |
|             |         | 10.0 *                  | 94.0     | 4.2             | 3.9            |
|             |         | 20.0                    | 94.8     | 4.0             | 4.9            |
|             | SAR     | 0.2                     | 82.0     | 4.9             | 5.2            |
|             |         | 2.5                     | 85.7     | 3.3             | 4.1            |
|             |         | 5.0 *                   | 87.3     | 3.9             | 4.6            |
|             |         | 10.0                    | 87.5     | 3.5             | 4.3            |
| Egg yolk    | FF      | 5.0                     | 80.4     | 4.6             | 5.3            |
|             |         | 10.0 *                  | 87.5     | 4.0             | 3.8            |
|             |         | 20.0                    | 90.5     | 3.6             | 3.7            |
|             | FFA     | 2.0                     | 73.2     | 4.3             | 4.7            |
|             |         | 5.0                     | 78.4     | 4.5             | 4.9            |
|             |         | 10.0 *                  | 81.4     | 4.7             | 4.6            |
|             |         | 20.0                    | 81.9     | 3.9             | 3.9            |
|             | CIP     | 0.1                     | 72.6     | 4.6             | 5.8            |
|             |         | 5.0                     | 77.8     | 4.3             | 5.4            |
|             |         | 10.0 *                  | 82.2     | 4.6             | 5.3            |
|             |         | 20.0                    | 83.8     | 3.9             | 3.7            |
|             | ENR     | 0.1                     | 86.2     | 6.6             | 7.3            |
|             |         | 5.0                     | 93.3     | 5.6             | 5.9            |
|             |         | 10.0 *                  | 93.9     | 4.2             | 4.4            |
|             |         | 20.0                    | 94.4     | 3.9             | 4.5            |
|             | SAR     | 0.2                     | 73.5     | 5.1             | 5.1            |
|             |         | 2.5                     | 76.9     | 3.5             | 3.9            |
|             |         | 5.0 *                   | 79.4     | 4.2             | 4.8            |
|             |         | 10.0                    | 80.7     | 3.8             | 4.1            |
| Egg albumen | FF      | 5.0                     | 87.4     | 4.5             | 5.2            |
|             |         | 10.0 *                  | 90.9     | 4.2             | 4.3            |
|             |         | 20.0                    | 92.2     | 3.9             | 4.1            |
|             | FFA     | 2.0                     | 75.1     | 4.9             | 5.8            |
|             |         | 5.0                     | 81.5     | 4.8             | 5.5            |
|             |         | 10.0 *                  | 80.8     | 4.4             | 5.6            |
|             |         | 20.0                    | 81.1     | 3.1             | 3.4            |
|             | CIP     | 0.1                     | 75.3     | 4.2             | 4.6            |
|             |         | 5.0                     | 81.7     | 4.5             | 5.2            |
|             |         | 10.0 *                  | 82.2     | 3.4             | 4.8            |

|  |     |        |      |     |     |
|--|-----|--------|------|-----|-----|
|  |     | 20.0   | 83.7 | 4.4 | 4.9 |
|  |     | 0.1    | 86.7 | 6.3 | 6.4 |
|  |     | 5.0    | 93.1 | 5.7 | 6.3 |
|  | ENR | 10.0 * | 91.7 | 4.1 | 5.7 |
|  |     | 20.0   | 94.6 | 3.9 | 4.6 |
|  |     | 0.2    | 82.4 | 6.1 | 7.0 |
|  |     | 2.5    | 85.6 | 4.9 | 6.2 |
|  | SAR | 5.0 *  | 88.2 | 4.1 | 4.8 |
|  |     | 10.0   | 89.3 | 3.6 | 4.2 |

Note: \*, MRL.
